# Supplementary material for: Turnover of Lecanoroid Mycobionts and Their Trebouxia Photobionts Along an Elevation Gradient in Bolivia Highlights the Role of Environment in Structuring the Lichen Symbiosis
Source: PubMed Central journal article supplement (PMC8721194; doi:10.3389/fmicb.2021.774839), 2021-12-20

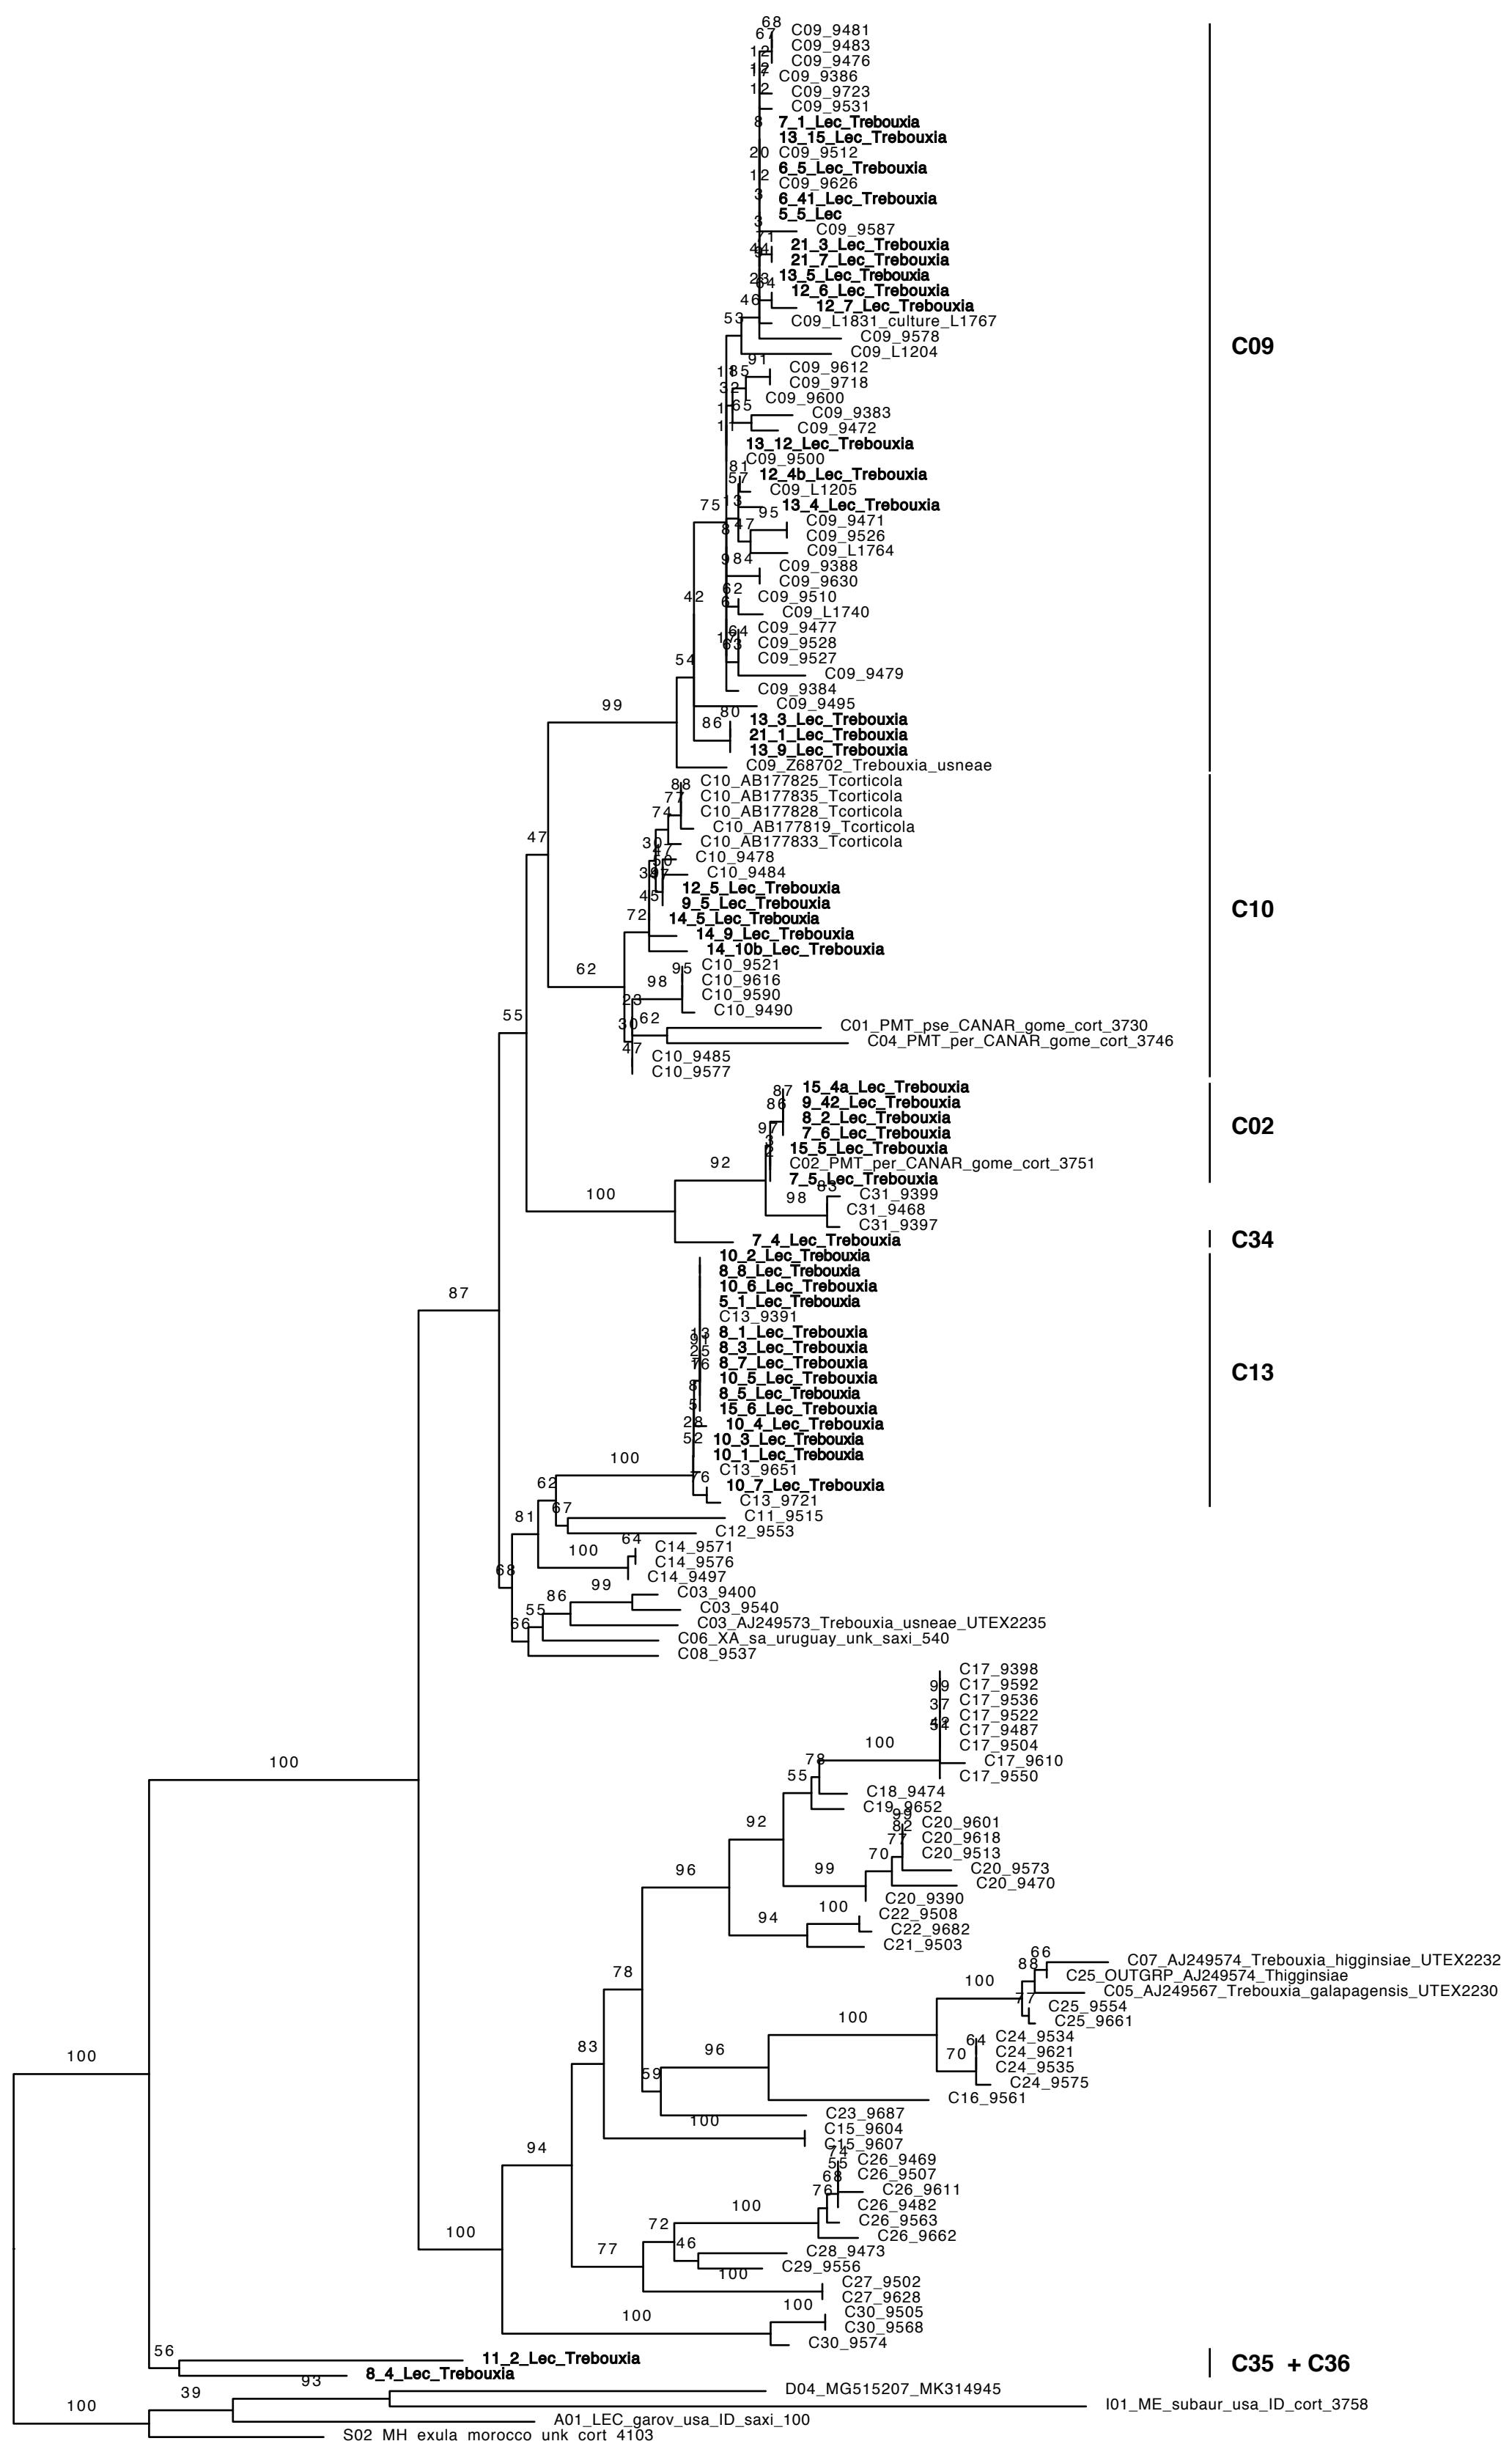

Supplement: Image_3.pdf [file Image_3.pdf]
