# Supplementary material for: Turnover of Lecanoroid Mycobionts and Their Trebouxia Photobionts Along an Elevation Gradient in Bolivia Highlights the Role of Environment in Structuring the Lichen Symbiosis
Source: PubMed Central journal article supplement (PMC8721194; doi:10.3389/fmicb.2021.774839), 2021-12-20
Supplement: Image_11.pdf [file Image_11.pdf]

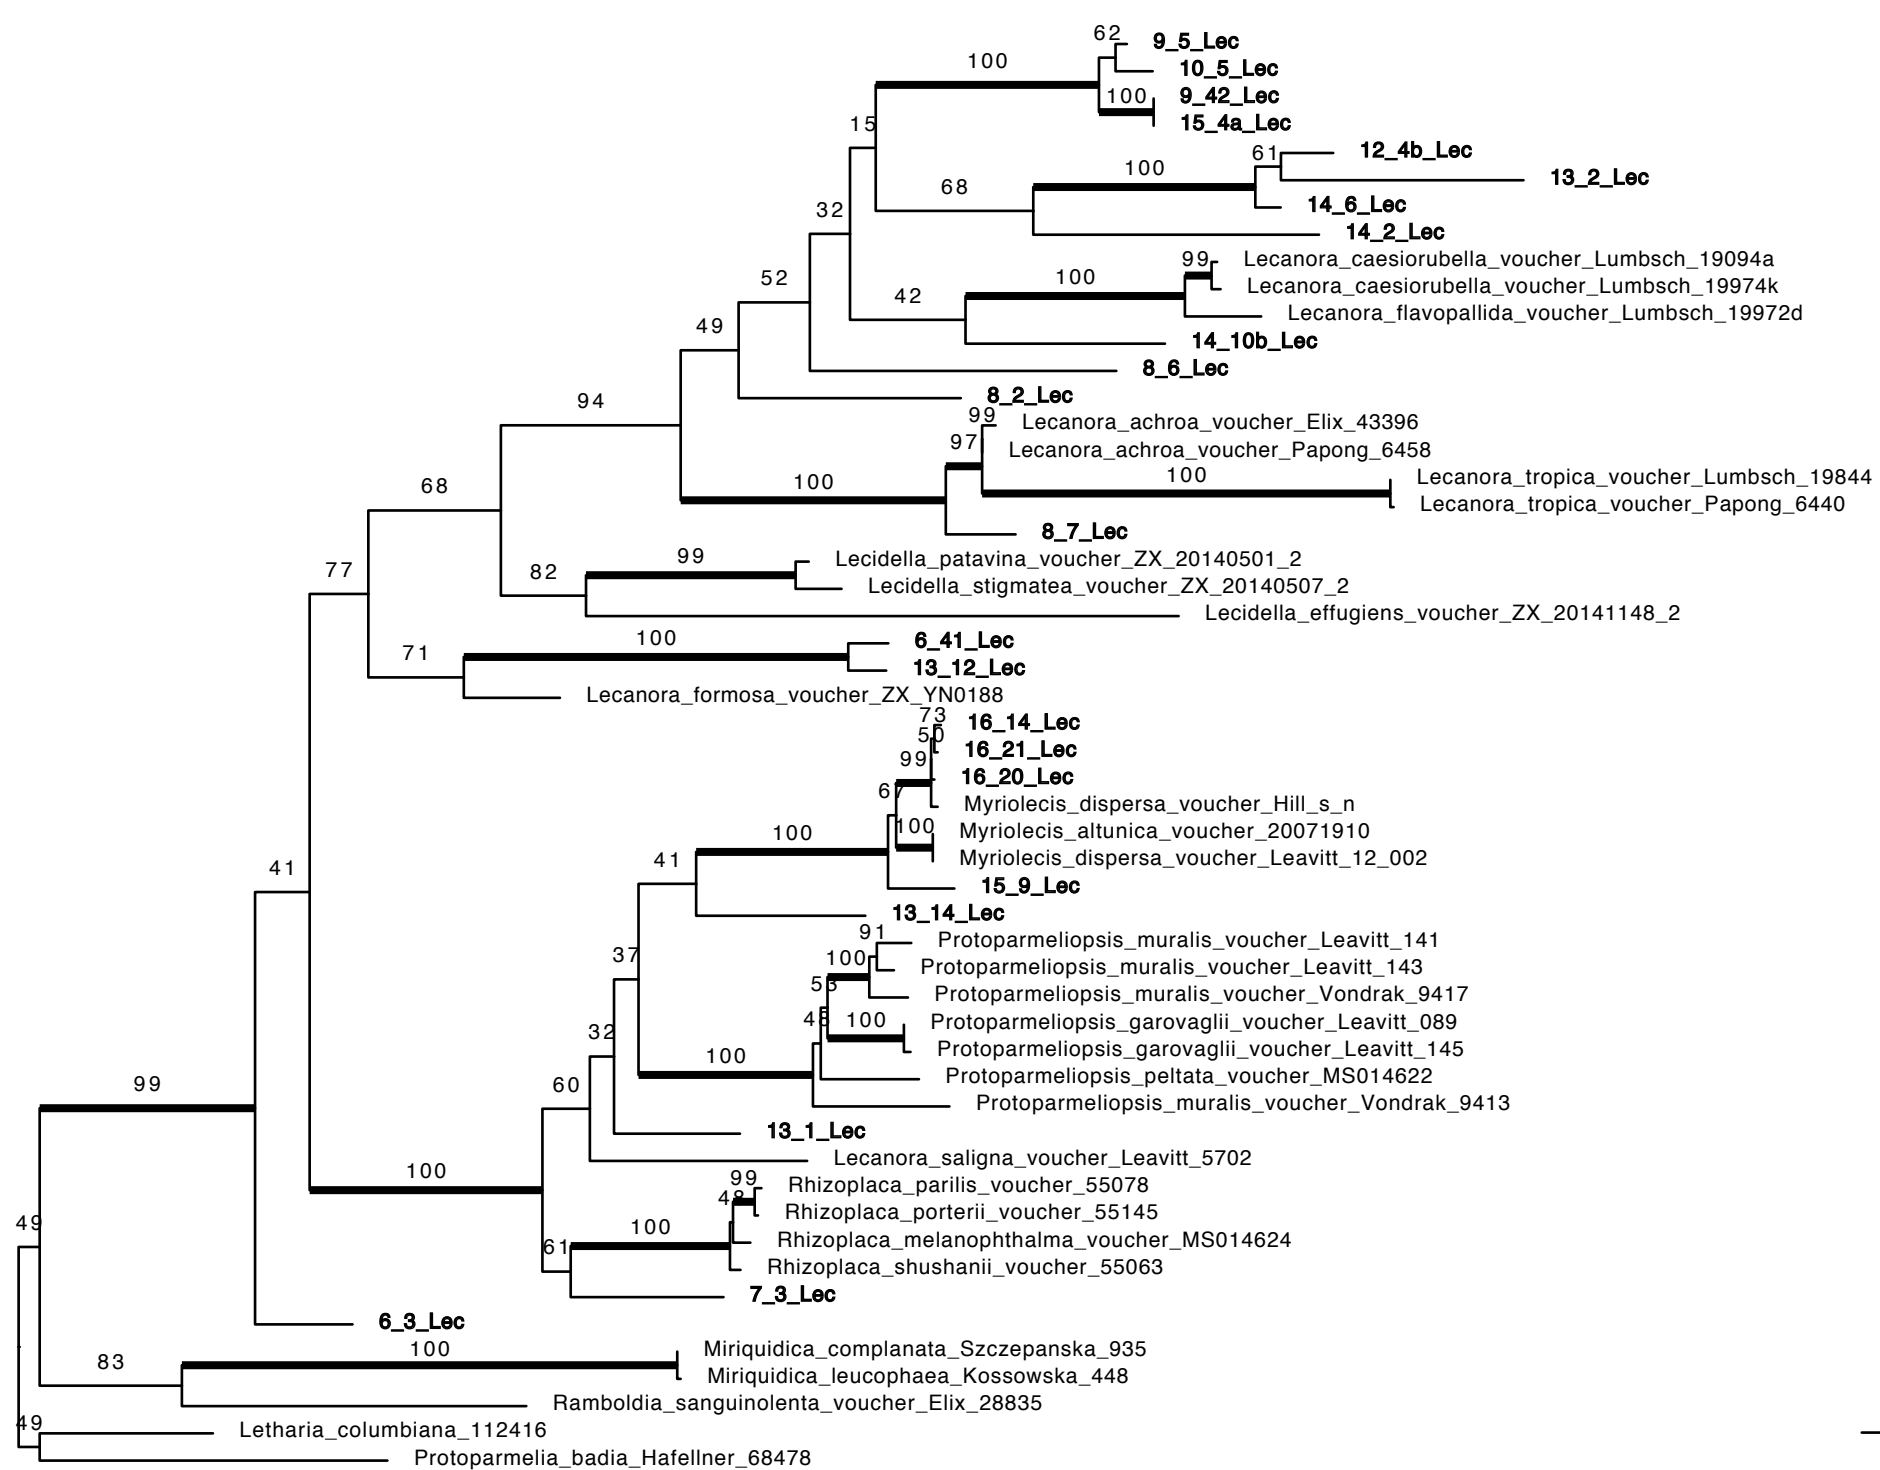

0.07

Supplementary figure 11. Single-locus tree for Lecanoraceae *MCM7*. Maximum-likelihood tree inferred with the TIM+F+I+G4 substitution model. Support values are UFboot2 with 5000 replicates. Bipartitions with bootstrap support  $\geq 95$  are indicated with bold branches. Bold tip names indicate specimens sequenced in this study. Scale indicates substitutions per site.
